# Supplementary material for: CRL4–DDB1–VPRBP ubiquitin ligase mediates the stress triggered proteolysis of Mcm10
Source: PubMed Central journal article supplement — Nucleic Acids Res. 2012 May 8;40(15):7332–46. doi: 10.1093/nar/gks366 (PMC3424545; doi:10.1093/nar/gks366), 2012-05-08

## CRL4-DDB1-VPRBP ubiquitin ligase mediates the stress triggered proteolysis of Mcm10

Manpreet Kaur, Md. Muntaz Khan, Ananya Kar, Aparna Sharma and Sandeep Saxena\*

### Supplementary Materials and Methods

**Cell culture, antibodies and western blotting.** Human HeLa and 293T were grown at 37°C in DMEM supplemented with 10% fetal bovine serum. Caffeine and UCN-01 were purchased from Sigma and CGK733 was obtained from Calbiochem. UV irradiation was done using a UV crosslinker CL-1000 from UVP. Anti-human Mcm10 antibody was produced using recombinant His-tagged Mcm10 (cloned in pET28a vector), purified on nickel-NTA column (Qiagen). Rabbit were injected with recombinant protein along with complete Freund's adjuvant to obtain Mcm10 Ab. Anti-Mcm10 sera was affinity-purified using Mcm10 conjugated sepharose column. Mouse monoclonal anti-cyclin E, rabbit polyclonal anti-SKP2, rabbit polyclonal anti-cyclin B1 were purchased from Santa Cruz Biotechnology. Mouse monoclonal anti-PCNA was purchased from Cell Signaling Technology. Rabbit polyclonal anti-ROC1, rabbit polyclonal anti-DDB2, rabbit polyclonal anti-CDT2, rabbit polyclonal anti-CDT1, rabbit polyclonal anti-VprBP, rabbit monoclonal anti-cullin4a, mouse monoclonal anti-CDH1 and mouse monoclonal anti-Cdc20 were purchased from Abcam. Rabbit polyclonal anti-DDB1 was obtained from Gene Tex and Abcam. Mouse monoclonal anti-cullin1 was purchased from BD Pharmingen. Mouse monoclonal anti-HA and mouse monoclonal anti-myc were obtained from Sigma. Polyclonal goat anti-rabbit HRP and polyclonal rabbit anti-mouse HRP were obtained from Dako. Avidin D, Peroxidase labeled (Av-HRP), Concentrate was obtained from Vector Labs. For western blotting, cells were harvested in 1X SDS sample buffer. Equal amount of protein was separated on SDS-polyacrylamide gels and then transferred onto nitrocellulose membranes. Finally the results were assayed using the Enhanced Chemiluminescence method.

**Cell cycle synchronization and BrdU labeling.** Synchronization of specific RNAi depleted HeLa cells at mitotic phase was done using 9 $\mu$ M of RO-3306. Cells were blocked in RO-3306 for 18 h respectively and later the synchronized cells were obtained after a mitotic shake-off. After 3-4 washes with 1XPBS, the synchronized cells were released into drug-free medium followed by harvesting at different time-points. pMX-puro retroviral vector used to express NTD+ID and CTD domains of Mcm10 in U2OS cells has been described previously. 2 h after UV irradiation, the cells were harvested for evaluating the levels of the respective domains by anti-HA immunoblotting. 16-24 h post UV irradiation, HeLa cells were incubated with 100  $\mu$ M BrdU followed by fixing with 4% formaldehyde, treatment with 2 M HCl and neutralization with 0.1 M sodium borate buffer (pH 8.5). The fixed cells were permeabilized with 0.2% Triton X-100, blocked with 3% BSA and incubated with a FITC-conjugated BrdU antibody.

**RNA extraction and reverse-transcriptase PCR.** For RNA extraction, the cell pellet obtained from the siRNA transfected cells was resuspended in TRIzol reagent (Invitrogen, Cat. No. 15596-018) followed by chloroform addition. The RNA from aqueous layer was precipitated using isopropanol and finally resuspended in RNase free water after 70% ethanol washes. For RT-PCR, RNA was quantified using NanoDrop spectrophotometer (NanoDrop Technologies, ND-1000). cDNA synthesis was carried out using 0.25-1  $\mu$ g RNA, 10  $\mu$ M oligo dT<sub>20</sub> primer, 1 mM dNTPs, 5X Mu-MLV reverse transcriptase buffer, RNase inhibitor (RNasin, Promega) and Mu-MLV reverse transcriptase enzyme (200 U/ $\mu$ l, Fermentas). The sequences of the primers used for PCR were as follows:

*BETA-2 MICROGLOBULIN*, forward primer: 5'GTTGACTTACTGAAGAATGGAGAGA3',

reverse primer: 5'TCAATATTA AAAAGCAAGCAAGCAG3',

*beta-TRCP*, forward primer: 5' TGTGCCAGACTCTGCTTAAACCAA 3',

reverse primer: 5' TTGATCTGACTCTGACCACTGCT 3',

*CDT2*, forward primer: 5'GAACCCATAGCATCCAAGTCTTTCC3',

reverse primer: 5'GGAGAAGTCTTCAACCCAGTCATAT3',  
*CUL1*, forward primer: 5'GCTTGCATTGGTGAAGTGGAGAGAC3',  
reverse primer: 5'GCCCAATTCCACGTAAGACTGTAC 3',  
*CDC20*, forward primer: 5'ATCTCAGGCCATGGCTTTGC3',  
reverse primer: 5'GGTCCAACCTCAAACAGCGC3',  
*CDH1*, forward primer: 5' AGTCAGAACCGGAAAGCCAA3',  
reverse primer: 5' ACACATCGTTGCCGTCATCG3',  
*CUL4A*, forward primer: 5'ACAGCGATCGTAATCAATCCTGAGA3',  
reverse primer: 5'GGATAAACCTGAACAGGATCATGAT3',  
*CUL4B*, forward primer: 5'CTAAAGACATCATGATTCAGTTCAA3',  
reverse primer: 5'ACTATGTTTGCCTAGGTAAAATGTC3'.  
*DDB2*, forward primer: 5'TCTGCTAGTAGCCGAATGGTGGTCA3',  
reverse primer: 5'TGTGCGGCAGCGAGTAGAGGAAG3',  
*FBXW7*, forward primer: 5'TGACGATTTTGATCAGTCTGA3',  
reverse primer: 5'ATGTAATTCGGCGTCGTTGTT3',  
*MCM10*, forward primer: 5'GAGAGAACAACCTGCCTATCTGGAA3'  
reverse primer: 5'GACACGGCACTTCACTTCTCTGATG3',  
*ROC1*, 5'CTCTGGCCTGGGATATTGTGGTTG3',  
reverse primer: 5'TTTGAGCCAGCGAGAGATGCAGTG3',

**Construction of plasmids.** Construction of pET28a-Mcm10 has been described previously. For construction of full-length Mcm10, Mcm10 was amplified from cDNA and then cloned in pCDNA3-HA vector. Full-length DDB1, Cul4a, Roc1, ubiquitin and VprBP were also amplified from cDNA and then cloned in pCDNA3-HA vector. Subsequently, respective genes were subcloned into other vectors. The primers used for cloning are as follows:

Cloning primers for **pCDNA3-HA-Mcm10**:

**Full-length Mcm10 (1-875)**

Forward primer:

5'GATCAGATATCGCATGGATGAGGAGGAAGACAATCTG 3'

Reverse primer:

5'ATAGTTTAGCGGCCGCTTATTTAAGGCTGTTTCAGAAATTTAGC 3'

**Fragment 1-240aa (NTD domain) with NLS**

Forward primer:

5'GATCGATATCGCCCAAAAAAGAAGAGAAAGGTACAATTCATGGATGAGGAGGAAGACAA  
TCTG 3'

Reverse primer:

5'ATAGTTTAGCGGCCGCTTATTTCCCAAGAACTTCCCTGGGGT 3'

**Fragment 1-430aa (NTD +ID domain) with NLS**

Forward primer:

5'GATCGATATCGCCCAAAAAAGAAGAGAAAGGTACAATTCATGGATGAGGAGGAAGACAA  
TCTG 3'

Reverse primer:

5'ATAGTTTAGCGGCCGCTTACAGATCCGCACGCTTTGCGCT 3'

**Fragment 240-430aa (ID domain) with NLS**

Forward primer:

5'GATCGATATCGCCCAAAAAAGAAGAGAAAGGTACAATTCGAAACGACTCAACCCATCTGT  
GTG 3'

Reverse primer:

5'ATAGTTTAGCGGCCGCTTACAGATCCGCACGCTTTGCGCT 3'

**Fragment 607-875aa (CTD domain) with NLS**

Forward primer:

5'GATCGATATCGCCCAAAAAAGAAGAGAAAGGTACAATTCCCTCCACGGACAGGATCCGAG  
TTC 3'

Reverse primer:

5'ATAGTTTAGCGGCCGCTTATTTAAGGCTGTTCAGAAATTTAGC 3'

**Cloning primers for N6-myc pCDNA3 Mcm10:**

Forward primer:

5'GAATTCGATATCATGGATGAGGAGGAAGACAATCTG3'

Reverse primer:

5'ATAGTTTAGCGGCCGCTTATTTAAGGCTGTTCAGAAATTTAGC3'

**Cloning primers for pCDNA3-HA-DDB1:**

Forward primer:

5'GATCAGATATCGCATGTCTGACAACTACGTGGTAACGGC3'

Reverse primer:

5'ATAGTTTAGCGGCCGCCTAATGGATCCGAGTTAGCTC3'

**Cloning primers for N6-myc pCDNA3 DDB1:**

Forward primer:

5'GAATTCGATATCATGTCTGACAACTACGTGGTAACGGC 3'

Reverse primer:

5'ATAGTTTAGCGGCCGCCTAATGGATCCGAGTTAGCTC 3'

**Cloning primers for pCDNA3-HA-Cul4a:**

Forward primer:

5'GATCAGATATCGCATGGCGGACGAGGCCCG3'

Reverse primer:

5'ATAGTTTAGCGGCCGCTCAGGCCACGTAGTGGTACTG3'

**Cloning primers for N6-myc pCDNA3 Cul4a:**

Forward primer:

5'GAATTCGATATCATGGCGGACGAGGCCCG 3'

Reverse primer:

5'ATAGTTTAGCGGCCGCTCAGGCCACGTAGTGGTACTG 3'

**Cloning primers for pCDNA3-HA-Roc1:**

Forward primer:

5'GATCAGATATCGCATGGCGGCAGCGATGGATGTG3'

Reverse primer:

5'ATAGTTTAGCGGCCGCCTAGTGCCATACTTTTGAAT3'

**Cloning primers for N6-myc pCDNA3 Roc1:**

Forward primer:

5'GAATTCGATATCATGGCGGCAGCGATGGATGTG 3'

Reverse primer:  
5' ATAGTTTAGCGGCCGCCTAGTGCCATACTTTTGGAAAT 3'

Cloning primers for **pCDNA3-HA-Ubiquitin:**

Forward primer:  
5' GATCAGATATCGCATGCAGATCTTCGTGAAAACCCTT3'  
Reverse primer:  
5' ATAGTTTAGCGGCCGCCTAACCACCTCTCAGACGCAGGACCAG3'

Cloning primers for **pCDNA3-HA-VprBP (1093-1311):**

Forward primer:  
5' GATCGATATCGCGAGAGTGGCTTACCTGCTGT 3'  
Reverse primer:  
5' ATAGTTTAGCGGCCGCAGCTCCATACATCACTGT 3'

Cloning primers for **N6-myc pCDNA3 VprBP:**

Forward primer:  
5' CCGGAATTCATGACTACAGTAGTGGTACAT3'  
Reverse primer:  
5' ATAGTTTAGCGGCCGCTCACTCATTTCAGAGATAAGATGAT3'

Cloning primers for **C-Terminus VprBP Fragment (864 to 1507aa)**

Forward primer:  
5' CCGGAATTCGCGGAGAAACAGCAACCGTGCT3'  
Reverse primer:  
5' ATAGTTTAGCGGCCGCTCACTCATTTCAGAGATAAGATGAT3'

## Figure Legends

**Figure S1. (A-D)** HeLa cells were transfected with *beta-TRCP*, *FBXW7* or control *GL2* siRNA and as described in Figure 2, the levels of Mcm10 protein were evaluated. The levels of mRNA (B-C) of the genes silenced by RNAi in part (A) were determined. Immunoblot in part (D) displays cyclin E stabilization after *FBXW7* RNAi. HeLa cells were transfected with *FBXW7* or control *GL2* siRNA and the levels of cyclin E protein were evaluated. The numbers indicate the levels of cyclin E protein following *FBXW7* siRNA depletion relative to control *GL2* transfected cells. **(E)** Mcm10 physically interacts with exogenously expressed Roc1 and Cul4a. 293T cells were transfected with pcDNA3 vector, pcDNA3-myc-Roc1 or pcDNA3-myc-Cul4a, lysed under mild conditions and immunoprecipitation was carried out with either anti-Mcm10 antibody or preimmune serum. Mcm10 band has been indicated by black arrowhead in the second and fourth panels (lane 4) while co-immunoprecipitation of Roc1-myc (part i) and Cul4a-myc (part ii) was evaluated by anti-myc antibody (indicated by shaded arrow in the first and third panels, lane 4).

**Figure S2.** Requirement of Roc1, Cul4, DDB1 and VprBP for UV-triggered Mcm10 degradation is confirmed by siRNA duplex targeting different regions of the target genes. **(A), (B), (D) and (F)** HeLa cells were transfected on three consecutive days with different *DDB1*, *ROCI*, *CUL4A+B* or *VPRBP* siRNA, targeting a different region than the siRNA duplex used in Figure 3 and 6. The new oligos used were *DDB1* (2), *ROCI* (2), *CUL4A* (2), *CUL4B* (2) and *VPRB*(2) siRNA. 24 h after the last transfection, the cells were exposed to UV, harvested 4 h later and Mcm10 levels (black arrowhead) were analyzed in non-irradiated (NI) and UV-irradiated (UV) cells. The numbers in panel (A), (B), (D) and (F) indicate the levels of Mcm10 protein in UV-irradiated cells relative to non-irradiated cells after specific siRNA transfections. The decrease in the levels of DDB1 and VprBP proteins was confirmed by immunoblotting (A and F) while the decrease of *ROCI* (C), *CUL4A* and *CUL4B* (E) mRNA levels was confirmed by RT-PCR. **(G)** Cell cycle distribution was determined by flow cytometry of propidium iodide-stained DNA of VprBP depleted HeLa cells. The inset shows the percentage of total cells that are present in different phases. NS points to a non-specific band that displays equal protein loading in different lanes while  $\beta$ -2 microglobulin (BMG) serves as the internal RNA loading control.

**Figure S3. (A)** HeLa cells were transfected with either *GL2* or *DDB1* siRNA for three consecutive days and after the third transfection, they were incubated with DMSO or 9  $\mu$ M RO-3306 for 18 h. Subsequently, the cells were exposed to UV, harvested 4 h later and Mcm10 levels were analyzed in non-irradiated (NI) and UV-irradiated (UV) cells. The numbers in panel (A) indicate the levels of Mcm10 protein in UV-irradiated cells relative to non-irradiated cells after the specific treatment. NS points to a non-specific band that displays equal protein loading. **(B)** Cell cycle distribution was determined by flow cytometry of propidium iodide-stained DNA of HeLa cells, as described in (A).

Figure S1

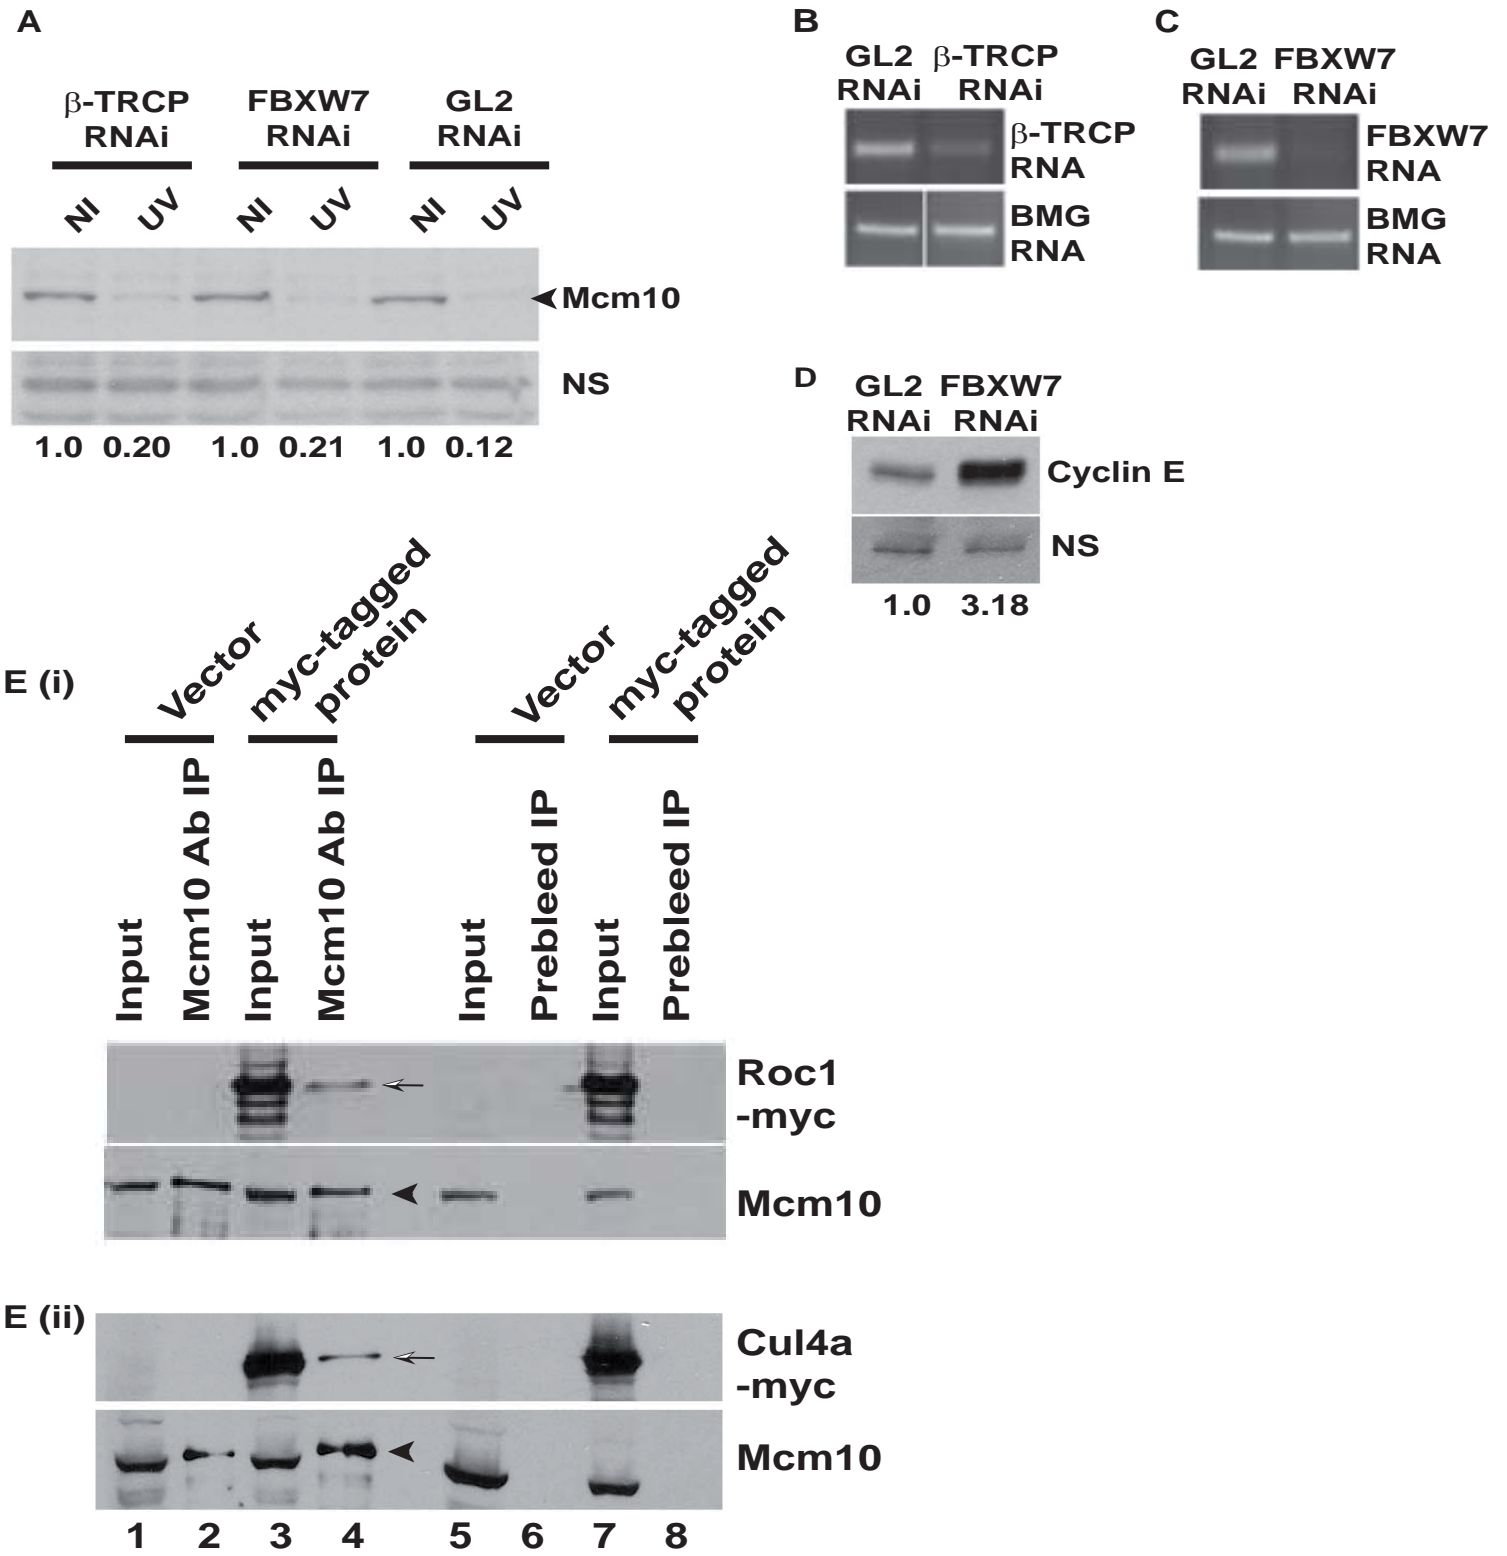

Figure S2

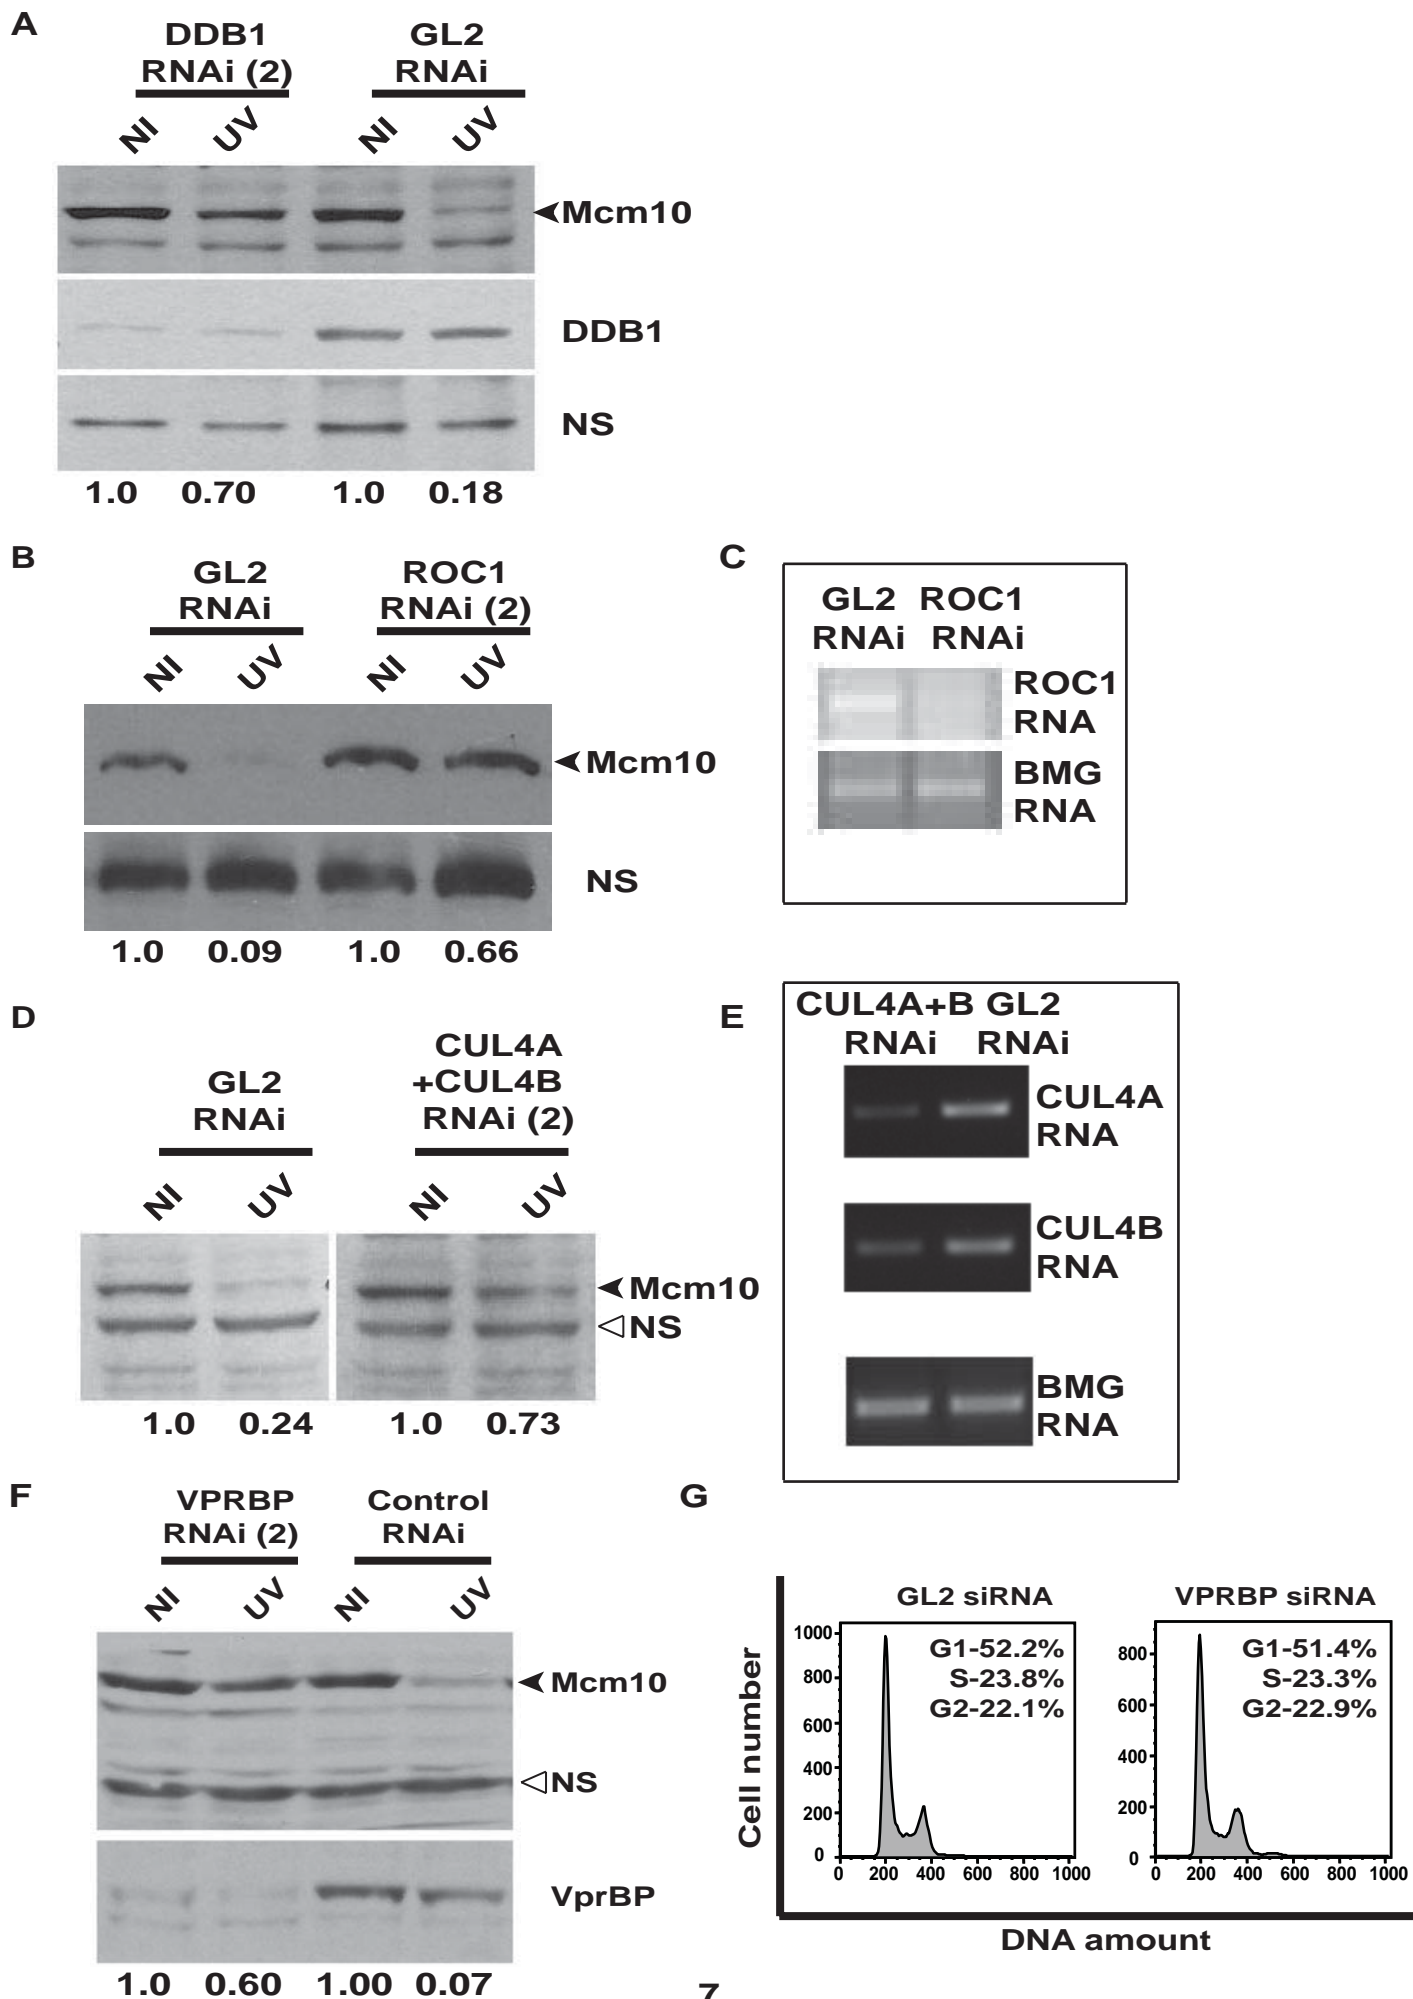

Figure S3

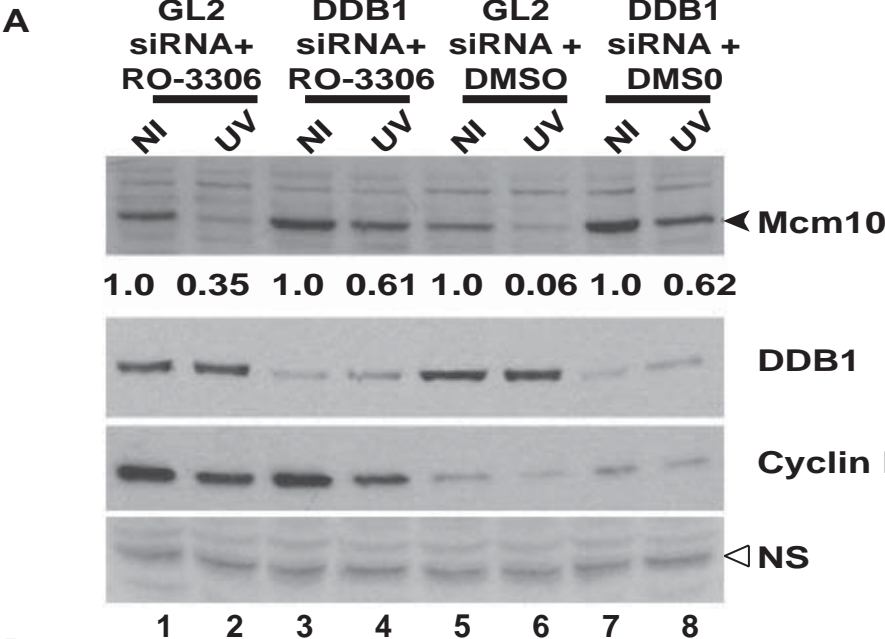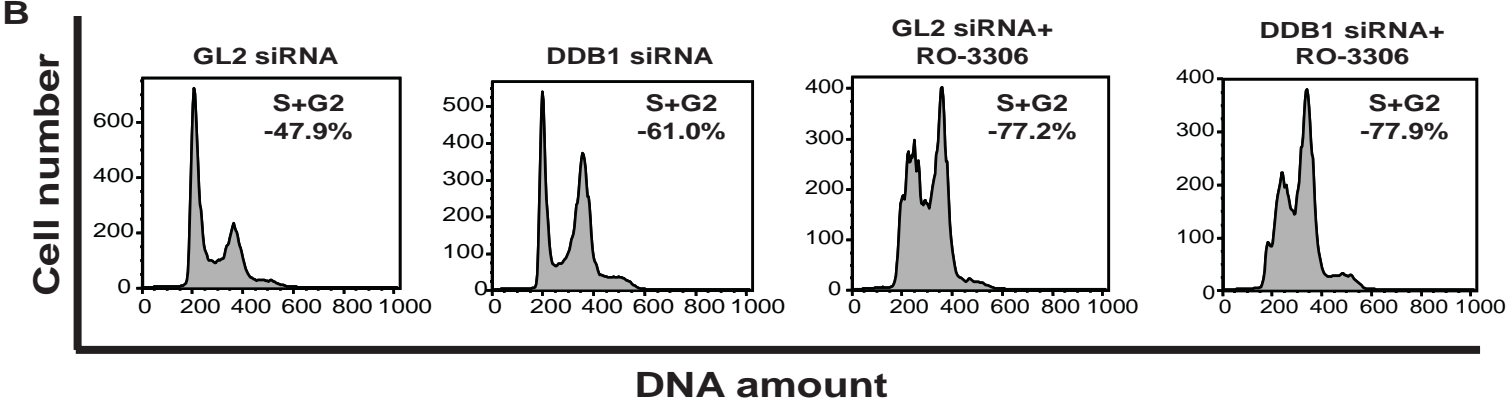

Supplement: supp_gks366_nar-02435-v-2011-File009.pdf [file supp_gks366_nar-02435-v-2011-File009.pdf]
